# Supplementary material
Source: publisher site journal article supplement (https://www.spandidos-publications.com/8471/downloadSupplementary)

Figure S1. Representative flow cytometric immunophenotyping plots of bone marrow after induction therapy. (A) Gating of bone marrow cells (P3) based on CD45 vs. SSC, with separation of Lym, Mono, Ery and Gra. (B) CD19<sup>+</sup> B-lineage cells (P4) were isolated from P3. (C and D) Within P4, plasma cells or plasmablasts (P13, CD10<sup>-</sup> and CD20<sup>-</sup>) and normal mature B lymphocytes (P14, CD34<sup>-</sup> and CD20<sup>bright</sup>) were gated as internal controls, while pro-B lymphocytes were identified as CD10<sup>+</sup>/<sup>bright</sup>, CD34<sup>+</sup>/<sup>bright</sup>, CD20<sup>-dim</sup> cells, accounting for 0.07% of all nucleated cells. (E-I) Immunophenotypic analysis showed no abnormal phenotype consistent with B-lymphoblastic leukemia. P3, population 3; P4, population 4; P13, population 13; P14, population 14; SSC, side scatter; Lym, lymphocytes; Mono, monocytes; Ery, erythrocytes; Gra, granulocytes; CD, cluster of differentiation.

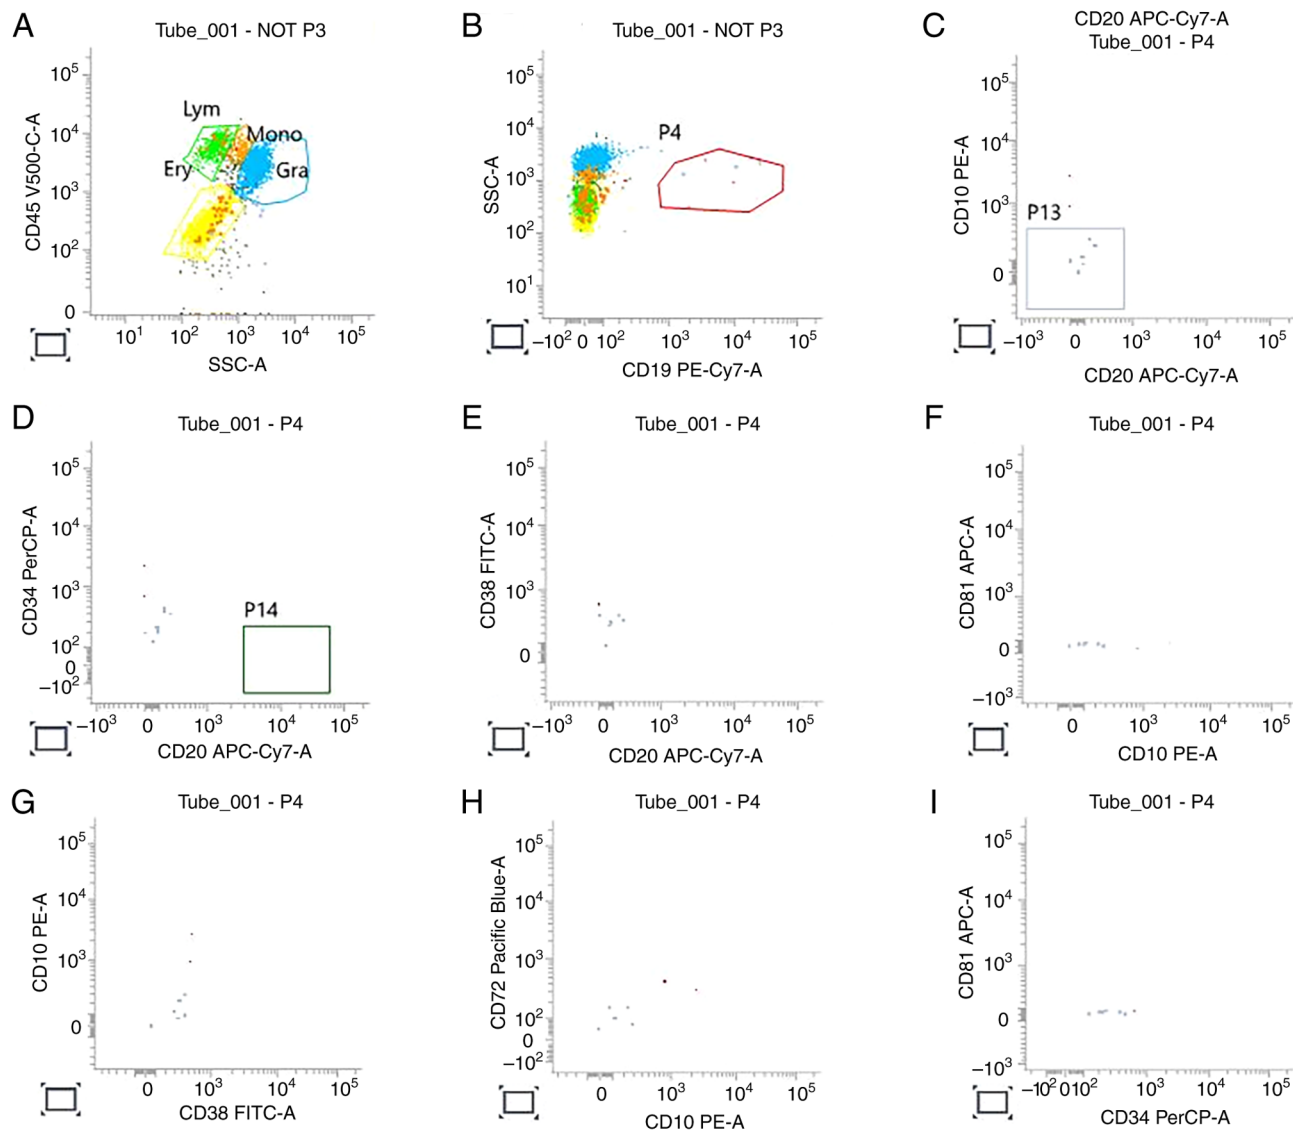

Supplement: Supplementary file 1 [file downloadSupplementary]
